# Supplementary material
Source: Springer Nature journal article supplement (https://www.springermedizin.de/resource/supplementary/12894_2011_181_MOESM1_ESM.pdf/9513134)

TVT surgery

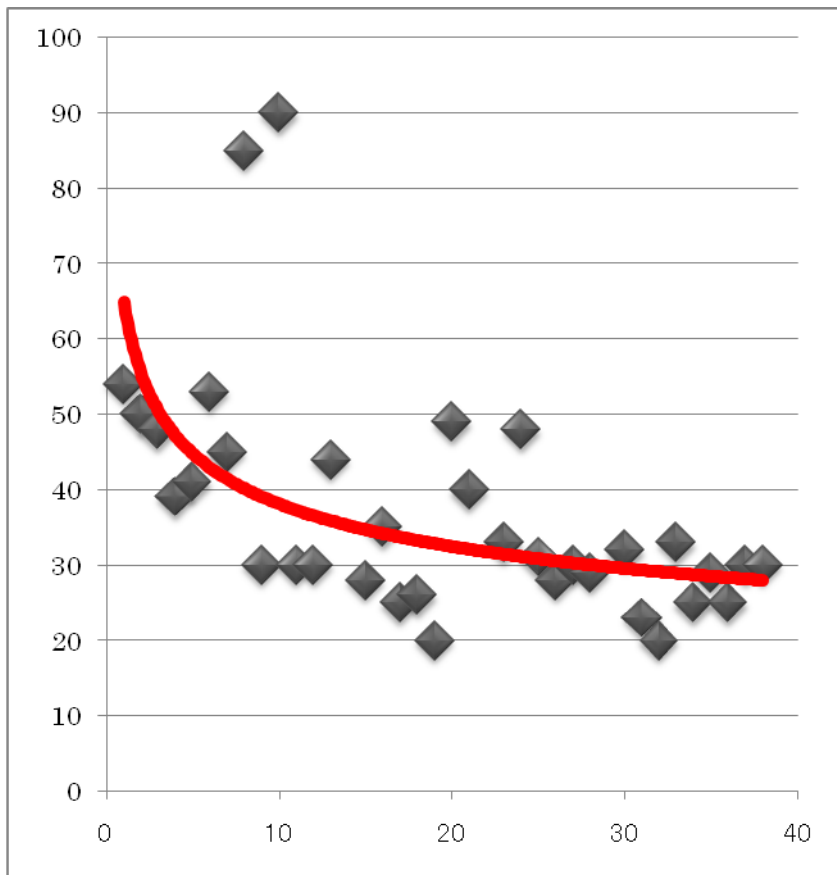

TOT surgery

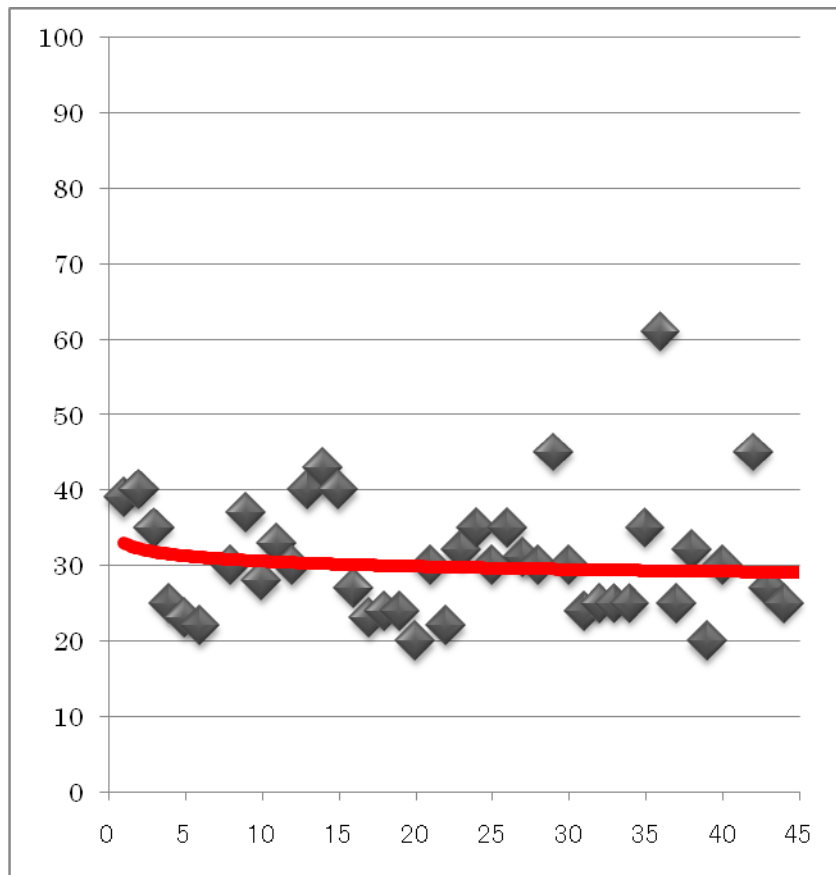

— Approximate curve

surgical number (case)

surgical duration (min)

Supplement: MOESM1 [file 9513134]
